# Supplementary material for: Plant-Produced S1 Subunit Protein of SARS-CoV-2 Elicits Immunogenic Responses in Mice
Source: MDPI journal article supplement (doi:10.3390/vaccines10111961), 2022-11-18
Supplement: s1 [file s1]

Plant-Produced S1 Subunit Protein of SARS-CoV-2 Elicits Immunogenic Responses in Mice

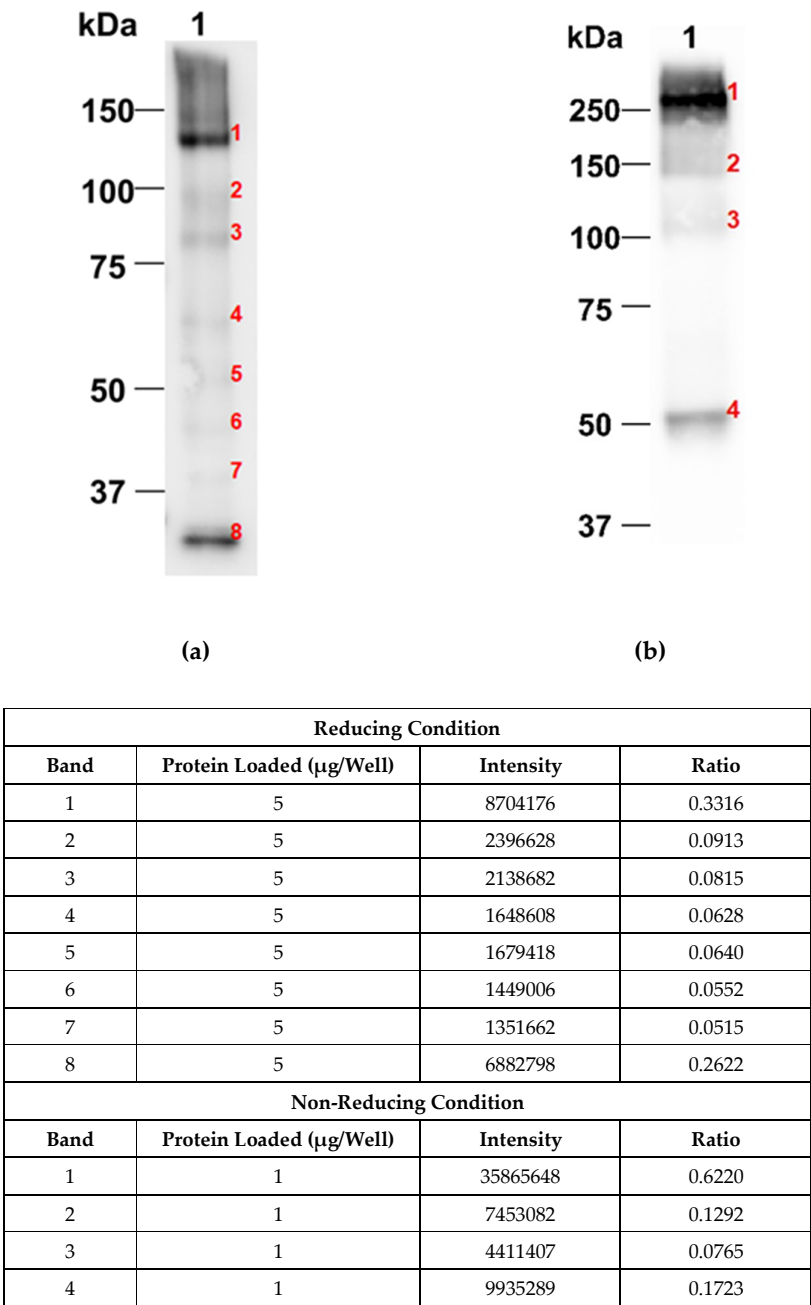

**Figure S1.** The western blot and densitometry readings/intensity ratio of plant-produced SARS-CoV-2 S1-Fc protein. The SARS-CoV-2 S1-Fc protein was purified by single-step protein A affinity chromatography and the purified plant-produced SARS-CoV-2 S1-Fc was analyzed by western blot analysis under reducing (a) and non-reducing conditions (b), respectively.

**Table S1.** SARS-CoV-2 RBD-specific T-cell responses in immunized mice. Mouse splenocytes were stimulated with RBD peptide pools and analyzed by mouse IFN- $\gamma$  ELISpot assay. Data presented as mean  $\pm$  SD (n = 5). SFCs: Spot-forming cells.

| Group | Vaccination                        | Sample No.    | IFN- $\gamma$ ELISpot (SFU/10 <sup>6</sup> Splenocyte) |          |                   |                   |                   |                   |
|-------|------------------------------------|---------------|--------------------------------------------------------|----------|-------------------|-------------------|-------------------|-------------------|
|       |                                    |               | Negative                                               | Positive | SARS-CoV-2-Pool#3 | SARS-CoV-2-Pool#4 | SARS-CoV-2-Pool#5 | Total             |
| 1     | PBS + Alum                         | 1             | 0                                                      | 2496     | 0                 | 0                 | 0                 | 0                 |
|       |                                    | 2             | 0                                                      | 2446     | 0                 | 0                 | 0                 | 0                 |
|       |                                    | 3             | 0                                                      | 578      | 0                 | 0                 | 0                 | 0                 |
|       |                                    | 4             | 0                                                      | 2726     | 0                 | 0                 | 0                 | 0                 |
|       |                                    | 5             | 0                                                      | 2616     | 0                 | 0                 | 0                 | 0                 |
|       |                                    | Mean $\pm$ SD |                                                        |          |                   |                   |                   | 0 $\pm$ 0         |
| 2     | 10 $\mu$ g SARS-CoV-2 S1-Fc + Alum | 1             | 0                                                      | 2244     | 0                 | 0                 | 172               | 172               |
|       |                                    | 2             | 0                                                      | 1952     | 22                | 0                 | 0                 | 22                |
|       |                                    | 3             | 0                                                      | 0        | 0                 | 0                 | 2                 | 2                 |
|       |                                    | 4             | 0                                                      | 2432     | 90                | 32                | 112               | 234               |
|       |                                    | 5             | 0                                                      | 2268     | 40                | 138               | 54                | 232               |
|       |                                    | Mean $\pm$ SD |                                                        |          |                   |                   |                   | 132.4 $\pm$ 112.9 |
